# Supplementary material for: Enhance luminescence or change morphology: effect of the doping method on Cu2+-doped CsPbBr3 perovskite nanocrystals
Source: Royal Society of Chemistry journal article supplement (doi:10.1039/d2ce01302a), 2022-01-01
Supplement: d2ce01302a1.pdf [file d2ce01302a1.pdf]

## Supporting Information

### Enhance Luminescence or change morphology: The effect of doping method on Cu<sup>2+</sup>-doped CsPbBr<sub>3</sub> perovskite nanocrystals

Meng Li, Yang Song\*, Feiyong Chen\*

Resources and Environment Innovation Institute, Shandong Jianzhu University, Jinan, 250101, P. R. China

Table S1 Preparation conditions of sample prepared by hot injection method

| Sample | PbBr <sub>2</sub> (mmol) | CuBr <sub>2</sub> (mmol) | Molar ratio of Cu/Pb | Temperature (°C) |
|--------|--------------------------|--------------------------|----------------------|------------------|
| HI-1   | 0.188                    | 0                        | 0                    | 140              |
| HI-2   | 0.188                    | 0.376                    | 2                    | 140              |
| HI-3   | 0.188                    | 0                        | 0                    | 160              |
| HI-4   | 0.188                    | 0.376                    | 2                    | 160              |
| HI-5   | 0.188                    | 0                        | 0                    | 180              |
| HI-6   | 0.188                    | 0.376                    | 2                    | 180              |
| HI-7   | 0.188                    | 0.564                    | 3                    | 180              |

Table S2 Preparation conditions of samples prepared by cation exchange reaction

| Sample | CsPbBr <sub>3</sub> (0.1 μM) | CuBr <sub>2</sub> (5 mM) | Adding Rate |
|--------|------------------------------|--------------------------|-------------|
| CE-1   | 2 mL                         | 50 μL                    | 2 μL/ min   |
| CE-2   | 2 mL                         | 100 μL                   | 2 μL/ min   |
| CE-3   | 2 mL                         | 150 μL                   | 2 μL/ min   |
| CE-4   | 2 mL                         | 200 μL                   | 2 μL/ min   |
| CE-5   | 2 mL                         | 250 μL                   | 2 μL/ min   |
| CE-6   | 2 mL                         | 300 μL                   | 2 μL/ min   |

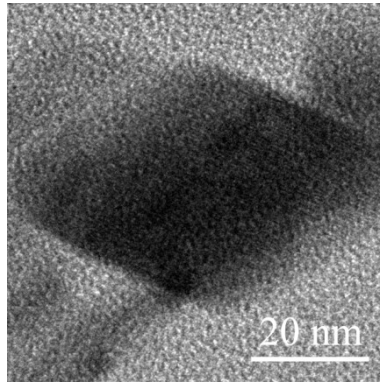

Figure S1 The enlarged image of rhombohedral specimens in Fig. 1 (a).

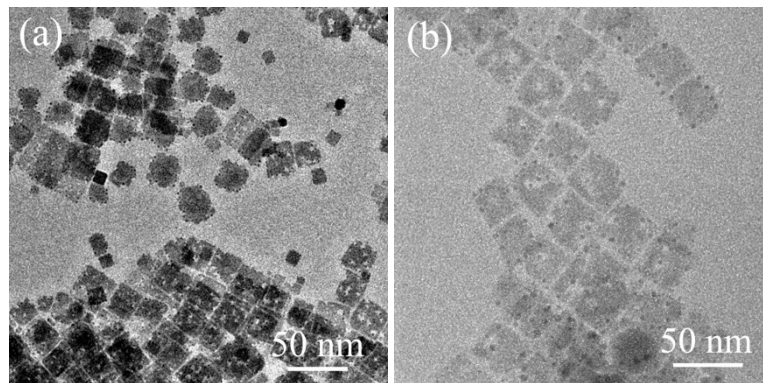

Figure S2 TEM image of sample HI-2 (a) and HT-4 (b) at low concentration.

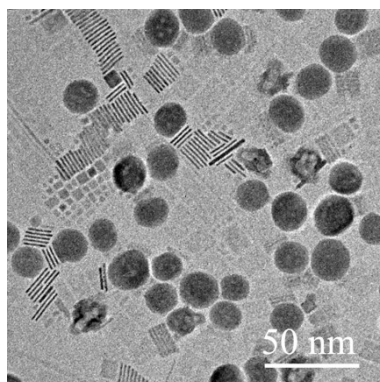

Figure S3 TEM images of sample HI-7.

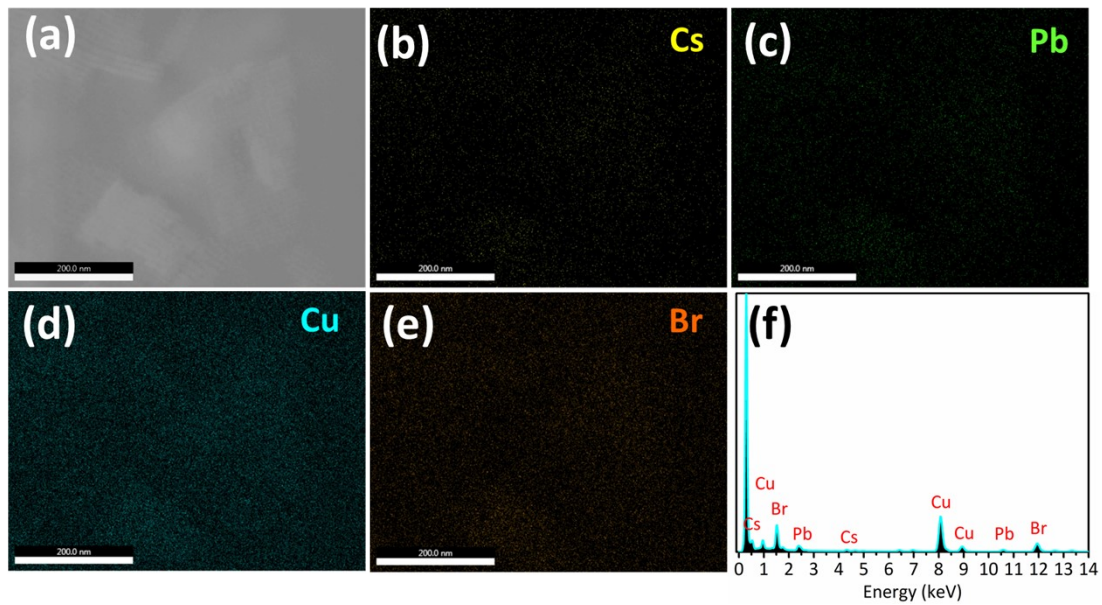

Figure S4 TEM image (a), elemental mapping of Cs, Pb, Cu, and Br in the scanned area (b–e), and EDX spectrum (f) of sample HI-6.

Table S3 ICP-OES analysis of sample HI-2, HI-6, CE-4

| Sample | Cu/Pb feeding ratio | Actual Cu/Pb ratio | Actual Cu doping content (mol %) |
|--------|---------------------|--------------------|----------------------------------|
| HI-2   | 2                   | 14.93:509.00       | 2.85                             |
| HI-6   | 2                   | 1.38:31.77.00      | 4.16                             |
| CE-4   | 5000                | 18.62:427.18       | 4.18                             |

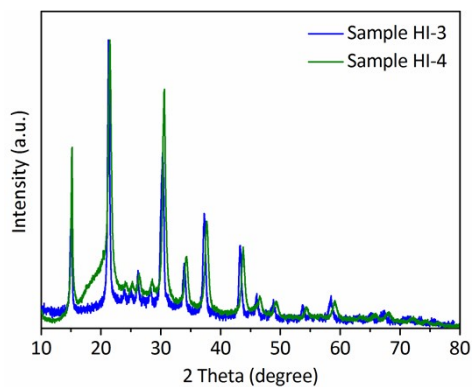

Figure S5 XRD patterns of sample HI-3 and HI-4.

Table S4 Ionic radius and calculated tolerance factor ( $\tau$ ) and octahedral parameter ( $\mu$ )

| Ion              | Ionic radius (pm) | Compound                                              | Calculated $\tau$ | Calculated $\mu$ |
|------------------|-------------------|-------------------------------------------------------|-------------------|------------------|
| Cs <sup>+</sup>  | 188               | CsPbBr <sub>3</sub>                                   | 0.86              | 0.61             |
| Pb <sup>2+</sup> | 119               | CsPb <sub>0.5</sub> Cu <sub>0.5</sub> Br <sub>3</sub> | 0.93              | 0.49             |
| Cu <sup>2+</sup> | 72                | CsCuBr <sub>3</sub>                                   | 1.00              | 0.37             |
| Br <sup>-</sup>  | 196               |                                                       |                   |                  |

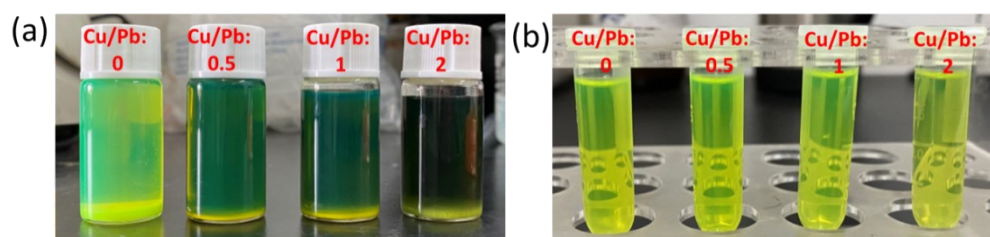

Figure S6 The color images of crude solution (a) and purified solution (b) of samples prepared by hot-injection method at 180 oC with the molar ratio of Cu/Pb at 0, 0.5, 1, 2; (b) The purified solution of the above four samples.

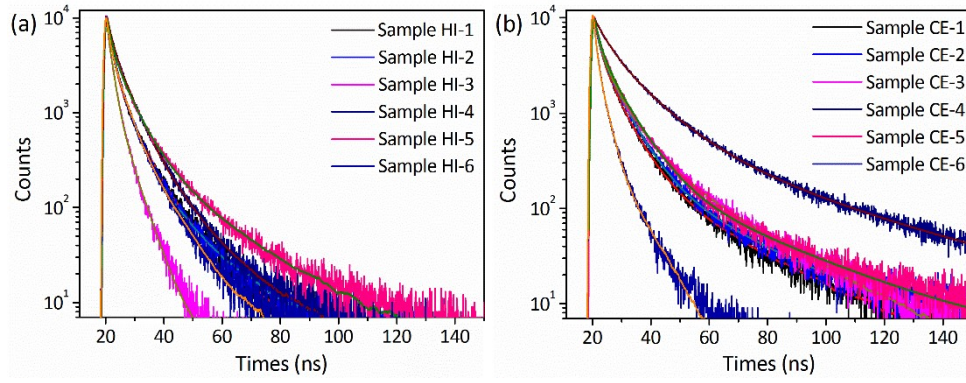

Figure S7 Time-resolved PL decay curves of samples.

Table S5 Components  $B_1/ B_2/ B_3$ , time constants  $\tau_1 / \tau_2/ \tau_3$ , and  $\tau_{average}$

| Sample | $\tau_1$ | $\tau_2$ | $\tau_3$ | $B_1$ | $B_2$ | $B_3$ | $\tau_{average}$ | CHISQ |
|--------|----------|----------|----------|-------|-------|-------|------------------|-------|
| HI-1   | 5.44     | 1.62     | 15.62    | 46.68 | 40.07 | 13.25 | 8.98             | 1.01  |
| HI-2   | 1.13     | 4.14     | 15.33    | 30.73 | 56.24 | 13.02 | 8.70             | 1.01  |
| HI-3   | 1.51     | 4.60     | 42.62    | 62.55 | 36.37 | 1.08  | 9.34             | 1.05  |
| HI-4   | 1.27     | 4.92     | 13.81    | 20.21 | 63.62 | 16.18 | 8.29             | 1.01  |
| HI-5   | 5.32     | 1.31     | 18.62    | 55.60 | 24.53 | 19.87 | 12.19            | 1.03  |
| HI-6   | 3.84     | 0.98     | 10.15    | 56.32 | 25.20 | 18.49 | 6.44             | 1.01  |
| CE-1   | 1.43     | 5.72     | 21.62    | 26.60 | 57.09 | 16.32 | 13.31            | 1.08  |
| CE-2   | 1.47     | 6.60     | 25.26    | 23.10 | 61.54 | 15.36 | 15.13            | 1.04  |
| CE-3   | 6.21     | 1.66     | 22.01    | 49.32 | 25.71 | 24.97 | 15.66            | 1.08  |
| CE-4   | 4.37     | 12.38    | 40.53    | 18.23 | 55.45 | 26.32 | 28.42            | 1.10  |
| CE-5   | 1.92     | 7.56     | 32.47    | 23.06 | 62.32 | 14.62 | 19.25            | 1.06  |
| CE-6   | 0.71     | 2.52     | 8.39     | 34.80 | 53.14 | 12.06 | 4.63             | 1.04  |

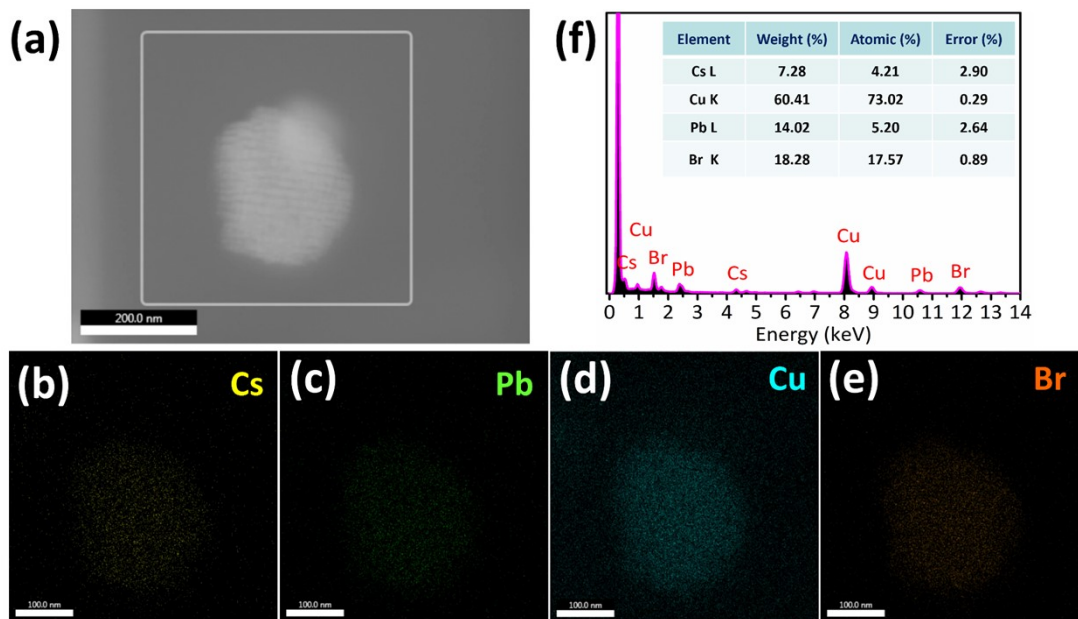

Figure S8 TEM image (a), elemental mapping of Cs, Pb, Cu, and Br in the scanned area (b–e), and EDX spectrum (f) of sample CE-4.

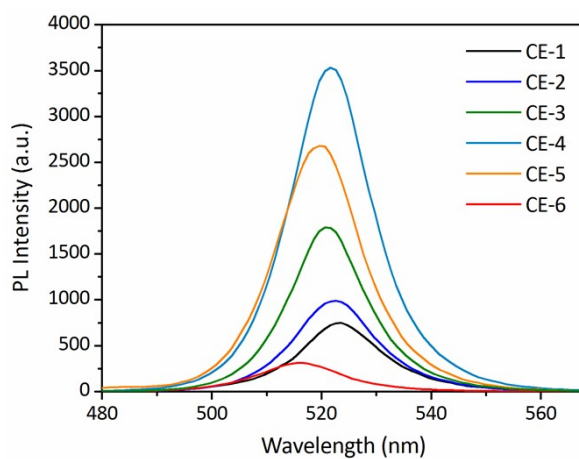

Figure S9 PL spectra of sample CE-1 to CE-5.

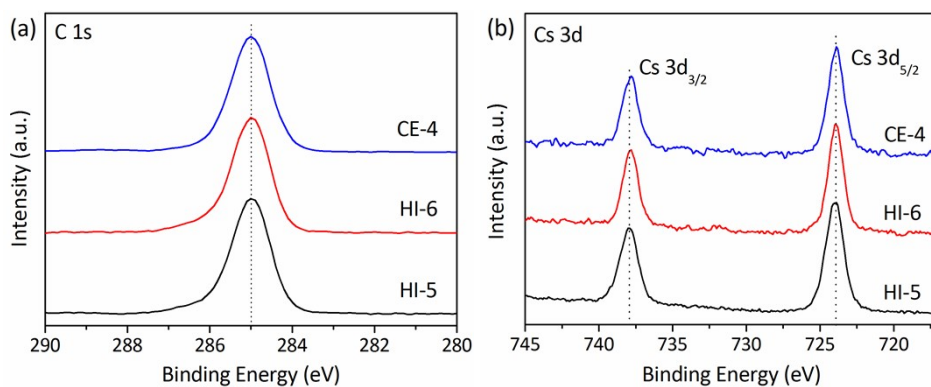

Figure S10 (a) XPS C 1s spectra after peak calibration at 285 eV. (b) Cs 3d spectrum of sample HI-5, HI-6, CE-4.

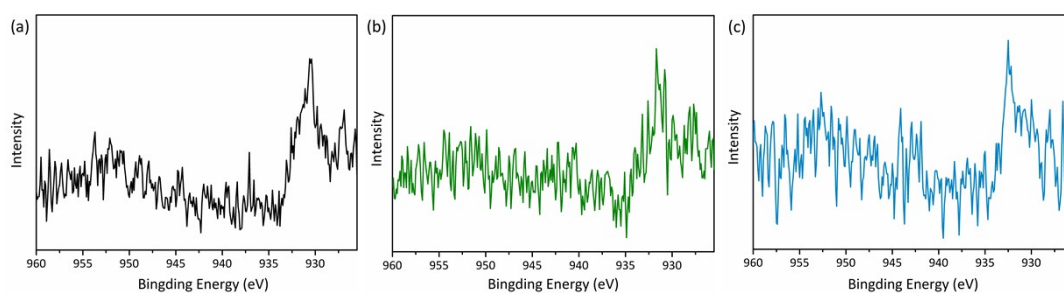

Figure S11 Cu 2p spectrum of sample HI-5 (a), HI-6 (b), CE-4 (c).

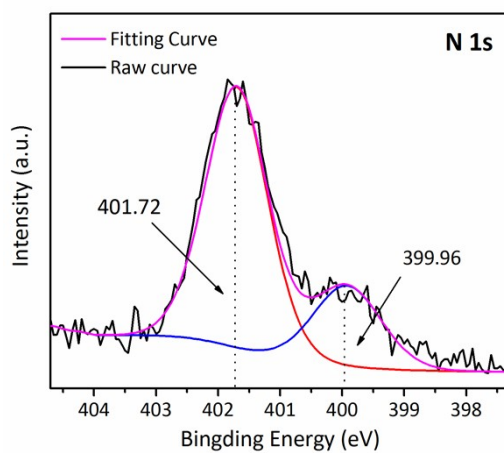

Figure S12 N 1s spectrum of sample HI-6.
